# Supplementary material for: Screening of anticoagulant active components in Xuefu Zhuyu decoction via affinity-ultrafiltration coupled with mass spectrometry
Source: Royal Society of Chemistry journal article supplement (doi:10.1039/d4ay01162g), 2024-01-01
Supplement: d4ay01162g1.pdf [file d4ay01162g1.pdf]

Table 1 Source information of each batch of XFZYD

| No. | Source information   |
|-----|----------------------|
| S1  | Guohetang Pharmacy   |
| S2  | LBX Pharmacy         |
| S3  | Yontinhe Pharmacy    |
| S4  | NZ Pharmacy          |
| S5  | Yifeng Pharmacy      |
| S6  | Jiuzhitang Co., Ltd. |
| S7  | Chujitang Pharmacy   |
| S8  | Nepstar Pharmacy     |
| S9  | Qianjin Pharmacy     |
| S10 | HuHaiTang Pharmacy   |

Table 2 The producer and batch number of each batch of Taoren

| No. | producer                                                        | batch number |
|-----|-----------------------------------------------------------------|--------------|
| S1  | Hunan SOLITA Traditional Chinese Medicine Slices Co., LTD       | 20211005     |
| S2  | Hunan Ran Run Tang Chinese Medicine Co., LTD                    | 220901       |
| S3  | Hunan Zhenxing Chinese Medicine Co., LTD                        | 220202       |
| S4  | Hunan Junhao Chinese medicine slices science and trade Co., LTD | 2022501004   |
| S5  | Hunan SOLITA Traditional Chinese Medicine Slices Co., LTD       | 23050903     |
| S6  | Hunan Hengyue Chinese Medicine Pieces Co., LTD                  | 230301       |
| S7  | Longxi Qizheng medicine limited liability company               | 20221201     |
| S8  | Changsha Xinlin Pharmaceutical Co., LTD                         | 230201       |
| S9  | Hunan Hongrui Chinese Medicine Slices Co., LTD                  | 22033009     |
| S10 | Hunan Junhao Chinese medicine slices science and trade Co., LTD | A220301      |

Table 3 The producer and batch number of each batch of Danggui

| No. | producer                                                                        | batch number |
|-----|---------------------------------------------------------------------------------|--------------|
| S1  | Hunan Zhenxing Chinese Medicine Co., LTD                                        | 230702       |
| S2  | Hunan Yaoshengtang Traditional Chinese Medicine Science and Technology Co., LTD | 22111107     |
| S3  | Hunan Zhenxing Chinese Medicine Co., LTD                                        | 22121504     |
| S4  | Hunan Zhenxing Chinese Medicine Co., LTD                                        | 20230601     |
| S5  | Hunan SOLITA Traditional Chinese Medicine Slices Co., LTD                       | 2301002      |
| S6  | Hunan new Shenzhilin Chinese Medicine slices Co., LTD                           | 2351704      |
| S7  | Hunan Yaoshengtang Traditional Chinese Medicine Science and Technology Co., LTD | 230306       |
| S8  | Hunan Zhenxing Chinese Medicine Co., LTD                                        | 230301       |
| S9  | Hunan Honghua Traditional Chinese Medicine slices Co., LTD                      | 23070703     |
| S10 | Hunan new Shenzhilin Chinese Medicine slices Co., LTD                           | 2301002      |

Table 4 The producer and batch number of each batch of Honghua

| No. | producer                                                                        | batch number |
|-----|---------------------------------------------------------------------------------|--------------|
| S1  | Hunan SOLITA Traditional Chinese Medicine Slices Co., LTD                       | 22072107     |
| S2  | Hunan Yaoshengtang Traditional Chinese Medicine Science and Technology Co., LTD | 220401       |
| S3  | Shijiazhuang Chengxin Chinese herbal medicine Co., LTD                          | 22072107     |
| S4  | Hunan Junhao Chinese medicine slices science and trade Co., LTD                 | 20221001     |
| S5  | Sichuan Neautus herbal slices Co., LTD                                          | 230501       |
| S6  | Hunan Junhao Chinese medicine slices science and trade Co., LTD                 | 220802       |
| S7  | Hunan Zhenxing Chinese Medicine Co., LTD                                        | 220901       |
| S8  | Hunan Zhenxing Chinese Medicine Co., LTD                                        | 2304136      |
| S9  | Anhui Huifeng Chinese medicine Co., LTD                                         | 221201       |
| S10 | Hunan Zhenxing Chinese Medicine Co., LTD                                        | 22072107     |

Table 5 The producer and batch number of each batch of Niuxi

| No. | producer                                                                        | batch number |
|-----|---------------------------------------------------------------------------------|--------------|
| S1  | Hunan SOLITA Traditional Chinese Medicine Slices Co., LTD                       | 20211201-1   |
| S2  | Hunan Yaoshengtang Traditional Chinese Medicine Science and Technology Co., LTD | 230201       |
| S3  | Henan Shanghuatang Pharmaceutical Co., LTD                                      | 191201       |
| S4  | Hunan Zhenxing Chinese Medicine Co., LTD                                        | 20230601     |
| S5  | Sichuan Neautus herbal slices Co., LTD                                          | 20230305     |
| S6  | Hunan Honghua Traditional Chinese Medicine slices Co., LTD                      | 230101       |
| S7  | Hunan Yaoshengtang Traditional Chinese Medicine Science and Technology Co., LTD | 230301       |
| S8  | Hunan Xinhui Pharmaceutical Co., LTD                                            | D2305151     |
| S9  | Changsha Xinlin Pharmaceutical Co., LTD                                         | 220301       |
| S10 | Hunan Hengyue Chinese Medicine Pieces Co., LTD                                  | 22121208     |

Table 6 The producer and batch number of each batch of Dihuang

| No. | producer                                                        | batch number |
|-----|-----------------------------------------------------------------|--------------|
| S1  | Hunan SOLITA Traditional Chinese Medicine Slices Co., LTD       | 01-22301011  |
| S2  | Anhui Runfurong Pharmaceutical Co., LTD                         | 230101       |
| S3  | Anhui Shenghaitang Traditional Chinese Medicine slices Co., LTD | 21112206     |
| S4  | Hunan Zhenxing Chinese Medicine Co., LTD                        | 03-221201010 |
| S5  | Henan Shanghuatang Pharmaceutical Co., LTD                      | 221001       |
| S6  | Hunan Junhao Chinese medicine slices science and trade Co., LTD | 2023010603   |
| S7  | Anhui Runfurong Pharmaceutical Co., LTD                         | 23013007     |
| S8  | Hunan Zhenxing Chinese Medicine Co., LTD                        | 230502       |
| S9  | Hunan Zhenxing Chinese Medicine Co., LTD                        | 202202060    |
| S10 | Hunan Junhao Chinese medicine slices science and trade Co., LTD | 221202       |

Table 7 The producer and batch number of each batch of Jiegeng

| No. | producer                                                                        | batch number |
|-----|---------------------------------------------------------------------------------|--------------|
| S1  | Hunan SOLITA Traditional Chinese Medicine Slices Co., LTD                       | 20211101     |
| S2  | Hunan Yaoshengtang Traditional Chinese Medicine Science and Technology Co., LTD | 230101       |
| S3  | Henan Shanghuatang Pharmaceutical Co., LTD                                      | 22122106     |
| S4  | Changsha Hao Sheng Chinese Medicine slices Co., LTD                             | 20230301-1   |
| S5  | Anhui Jiayou Chinese herbal slices Co., LTD                                     | 211102       |
| S6  | Hunan Junhao Chinese medicine slices science and trade Co., LTD                 | 221101       |
| S7  | Hunan Yaoshengtang Traditional Chinese Medicine Science and Technology Co., LTD | 202305201    |
| S8  | Hunan Zhenxing Chinese Medicine Co., LTD                                        | 200201       |
| S9  | Hunan Ran Run Tang Chinese Medicine Co., LTD                                    | 221101       |
| S10 | Hunan Zhenxing Chinese Medicine Co., LTD                                        | 22101903     |

Table 8 The producer and batch number of each batch of Chuanxiong

| No. | producer                                                                        | batch number |
|-----|---------------------------------------------------------------------------------|--------------|
| S1  | Hunan SOLITA Traditional Chinese Medicine Slices Co., LTD                       | 20230401     |
| S2  | Hunan Yaoshengtang Traditional Chinese Medicine Science and Technology Co., LTD | 230201       |
| S3  | Hunan Zhenxing Chinese Medicine Co., LTD                                        | 23020701     |
| S4  | Hunan Zhenxing Chinese Medicine Co., LTD                                        | 20230502     |
| S5  | Sichuan Qianfang Traditional Chinese Medicine Co., Ltd.                         | 2304001      |
| S6  | Hunan new Shenzhilin Chinese Medicine slices Co., LTD                           | 23030702     |
| S7  | Hunan Yaoshengtang Traditional Chinese Medicine Science and Technology Co., LTD | 23050206     |
| S8  | Hunan Zhenxing Chinese Medicine Co., LTD                                        | 202306083    |
| S9  | Anguo City Guangjitang Pharmaceutical Co., LTD                                  | 23030702     |
| S10 | Hunan Hengyue Chinese Medicine Pieces Co., LTD                                  | 23051009     |



Table 9 The producer and batch number of each batch of Chaihu

| No. | producer                                                                        | batch number |
|-----|---------------------------------------------------------------------------------|--------------|
| S1  | Hunan SOLITA Traditional Chinese Medicine Slices Co., LTD                       | 2305140      |
| S2  | Hunan Hengyue Chinese Medicine Pieces Co., LTD                                  | 230301       |
| S3  | Hunan Zhenxing Chinese Medicine Co., LTD                                        | 22010403     |
| S4  | Changsha Hao Sheng Chinese Medicine slices Co., LTD                             | 22111402     |
| S5  | Hunan Yaoshengtang Traditional Chinese Medicine Science and Technology Co., LTD | 230601       |
| S6  | Hunan Junhao Chinese medicine slices science and trade Co., LTD                 | 221201       |
| S7  | Sichuan Neautus herbal slices Co., LTD                                          | 230701       |
| S8  | Hunan Zhenxing Chinese Medicine Co., LTD                                        | 20230501     |
| S9  | Hunan Honghua Traditional Chinese Medicine slices Co., LTD                      | 22112808     |
| S10 | Hunan Junhao Chinese medicine slices science and trade Co., LTD                 | 220301       |

Table 10 The producer and batch number of each batch of Gancao

| No. | producer                                                                        | batch number |
|-----|---------------------------------------------------------------------------------|--------------|
| S1  | Shaoyang Shennong Chinese Medicine Technology development Co., LTD              | 20230204-1   |
| S2  | Hunan Hengyue Chinese Medicine Pieces Co., LTD                                  | 220701       |
| S3  | Shijiazhuang Chengxin Chinese herbal medicine Co., LTD                          | 22113001     |
| S4  | Changsha Hao Sheng Chinese Medicine slices Co., LTD                             | 220702       |
| S5  | Anhui Runfurong Pharmaceutical Co., LTD                                         | 230201       |
| S6  | Changsha Hao Sheng Chinese Medicine slices Co., LTD                             | 230301       |
| S7  | Hunan Yaoshengtang Traditional Chinese Medicine Science and Technology Co., LTD | 23051410     |
| S8  | Hunan Zhenxing Chinese Medicine Co., LTD                                        | 03-230911    |
| S9  | Yulin Guangjitang Chinese Medicine development limited liability company        | 220301       |
| S10 | Hunan Zhenxing Chinese Medicine Co., LTD                                        | 22120113     |

Table 11 The producer and batch number of each batch of Chishao

| No. | producer                                                   | batch number |
|-----|------------------------------------------------------------|--------------|
| S1  | Hunan Sanxiang Chinese Medicine Slices Co., LTD            | 22071511     |
| S2  | Hunan Hengyue Chinese Medicine Pieces Co., LTD             | 202104233    |
| S3  | Hunan Zhenxing Chinese Medicine Co., LTD                   | 20072002     |
| S4  | Hunan Ran Run Tang Chinese Medicine Co., LTD               | 23030117     |
| S5  | Hunan Honghua Traditional Chinese Medicine slices Co., LTD | 23080501     |
| S6  | Hunan Hengyue Chinese Medicine Pieces Co., LTD             | 202304151    |
| S7  | Hunan Zhenxing Chinese Medicine Co., LTD                   | 23011003     |
| S8  | Hunan Zhenxing Chinese Medicine Co., LTD                   | 230701       |
| S9  | Hunan Hengyue Chinese Medicine Pieces Co., LTD             | 22121007     |
| S10 | Hunan Hengyue Chinese Medicine Pieces Co., LTD             | 22032501     |

Table 12 The producer and batch number of each batch of Zhiqiao

| No. | producer                                                                        | batch number |
|-----|---------------------------------------------------------------------------------|--------------|
| S1  | Hunan SOLITA Traditional Chinese Medicine Slices Co., LTD                       | 20230202     |
| S2  | Hunan Yaoshengtang Traditional Chinese Medicine Science and Technology Co., LTD | 220902       |
| S3  | Shijiazhuang Chengxin Chinese herbal medicine Co., LTD                          | 22120712     |
| S4  | Changsha Hao Sheng Chinese Medicine slices Co., LTD                             | 220401       |
| S5  | Henan Haojian Pharmaceutical Co., LTD                                           | 230501       |
| S6  | Changsha Hao Sheng Chinese Medicine slices Co., LTD                             | 221003       |
| S7  | Hunan Yaoshengtang Traditional Chinese Medicine Science and Technology Co., LTD | 23032413     |
| S8  | Hunan Zhenxing Chinese Medicine Co., LTD                                        | 220925       |
| S9  | Hunan Hengyue Chinese Medicine Pieces Co., LTD                                  | 200501       |
| S10 | Hunan Hengyue Chinese Medicine Pieces Co., LTD                                  | 22091915     |
